# Supplementary material for: Reviews and syntheses: Carbon vs. cation based MRV of Enhanced Rock Weathering and the issue of soil organic carbon
Source: Copernicus journal article supplement (doi:10.5194/egusphere-2025-2740), 2025-06-19

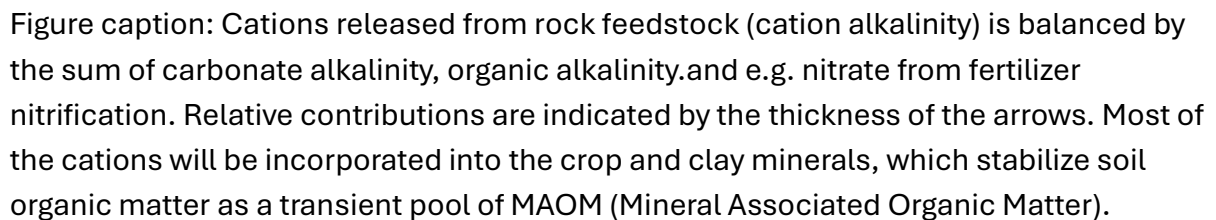

Supplement: Supplementary file [file egusphere-2025-2740-AC2-supplement.pdf]
